# Supplementary material
Source: Springer Nature journal article supplement (https://www.springermedizin.de/resource/supplementary/12888_2008_538_MOESM6_ESM.pdf/9483550)

**A**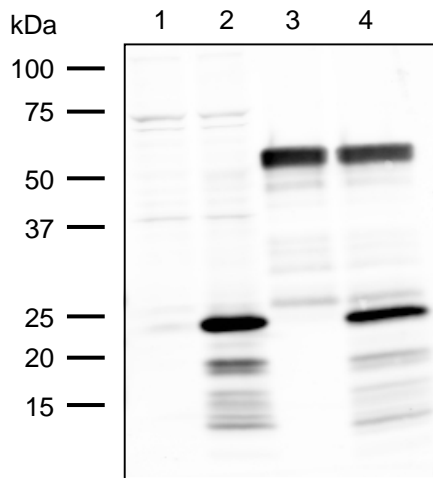**anti-G72 #1410**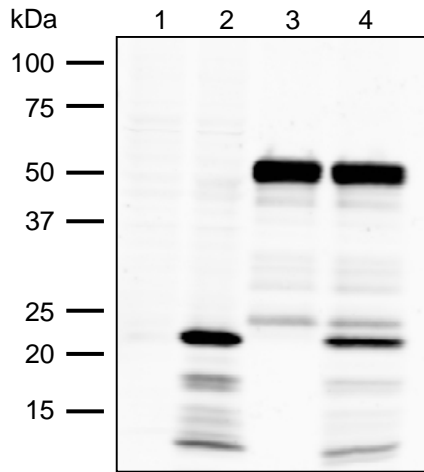**anti-G72 #1411****B**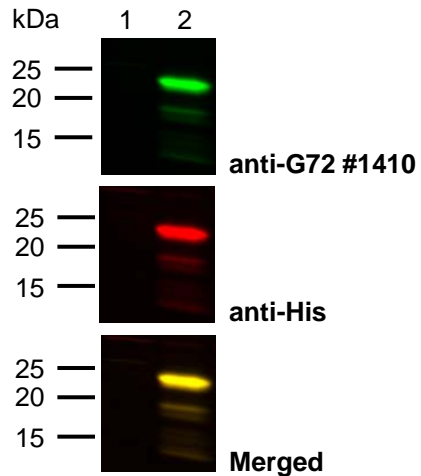**anti-G72 #1410****anti-His****Merged**

Supplement: MOESM6 [file 9483550]
